# Supplementary material
Source: publisher site journal article supplement (https://www.degruyter.com/publication/isbn/9783110310641/downloadAsset/9783110310641_Contents.pdf)
Supplement: Supplementary file 1 [file 9783110310641_Contents.pdf]

# Contents

**Introduction — 1**

**Chapter One: Providence in the early Christian Church's Theology — 5**

Ecumenical Beginnings after the Apostolic Era — 5

The Western development — 37

Political History — 45

**Chapter Two: The Medieval Account of Providence — 55**

Boethius first — 55

Medieval Historiography — 71

Byzantium and Eastern Christianity — 84

The Western High Middle Ages — 92

**Chapter Three: Later Medieval Developments — 104**

Alternatives to the High Medieval Consensus — 104

More radical traditions — 128

**Chapter Four: Reformation Providence — 135**

The impact of Luther — 135

Calvin and the Swiss-Dutch tradition — 141

The Heidelberg Catechism and Bullinger — 149

And the Lutherans? — 157

Catholic voices — 166

**Chapter Five: The Doctrine's Fortunes in the Early Modern Era — 173**

Protestant and Catholic perceptions — 173

Philosophical Moves — 189

Theological responses in the Early Enlightenment — 194

**Chapter Six: The Enlightenment's ongoing Challenge to the Doctrine of Providence — 202**

Later Enlightenment voices — 202

Hegel and Beyond — 221

**Chapter Seven: Providence in twentieth-century theological discussion — 231**

The major contribution of Barth: renewing the tradition — 233

Reactions to Barth on Providence — **242**

Providence in post-confessional German theology from 1960  
onwards — **247**

English-speaking discussion — **260**

Recent Catholic contribution to the Doctrine — **267**

The place of the historical in God's purposes — **272**

**Chapter Eight: Coming up to date: works in the last five years — 279**

**Conclusion — 291**

**Bibliography — 295**

**Index of Scripture References — 325**

**Index of Key Figures — 328**
